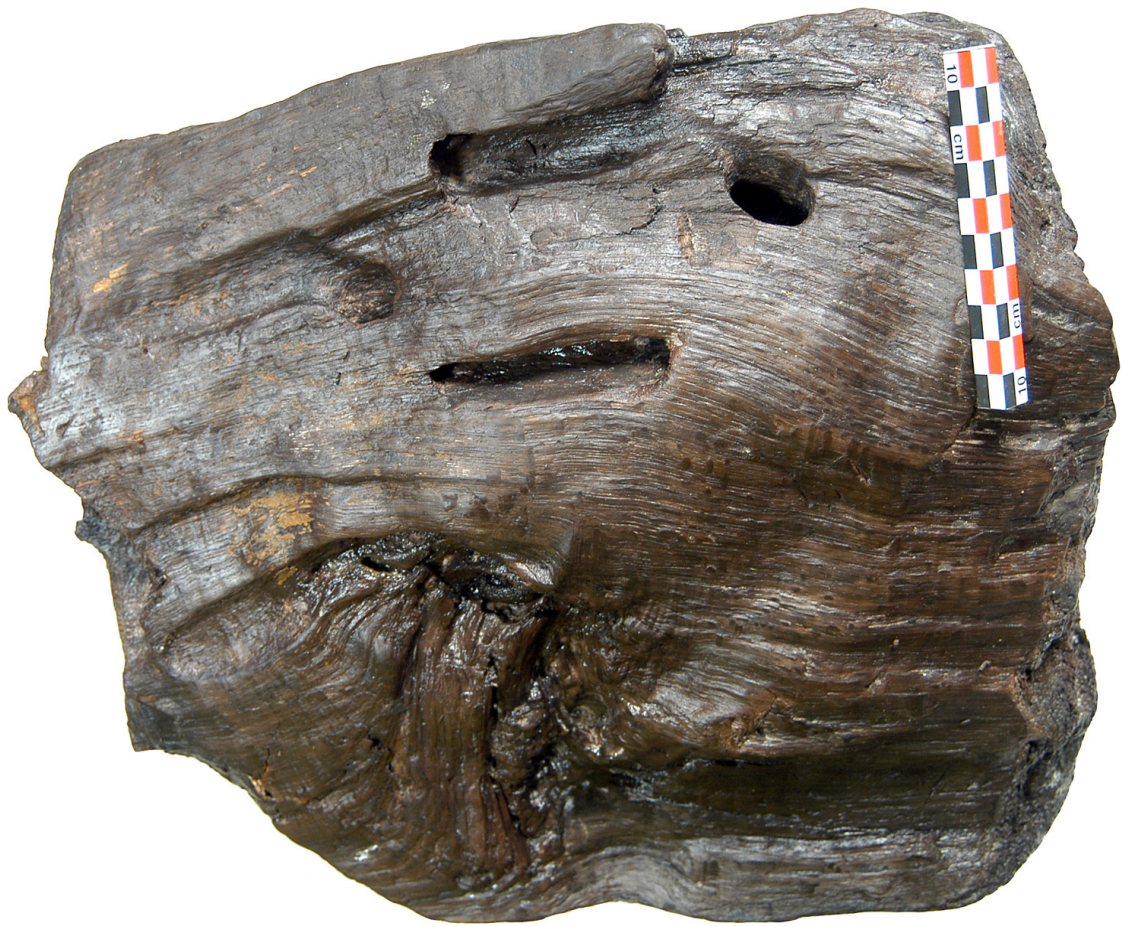

**Figure S7.** Great capricorn beetle galleries (*Cerambyx cerdo* L.).
