# Supplementary material for: Early Neolithic Water Wells Reveal the World's Oldest Wood Architecture
Source: PLOS journal article supplement (doi:10.1371/journal.pone.0051374), 2012-12-19
Supplement: S4 (10.1371/journal.pone.0051374.s004) [file journal.pone.0051374.s004]

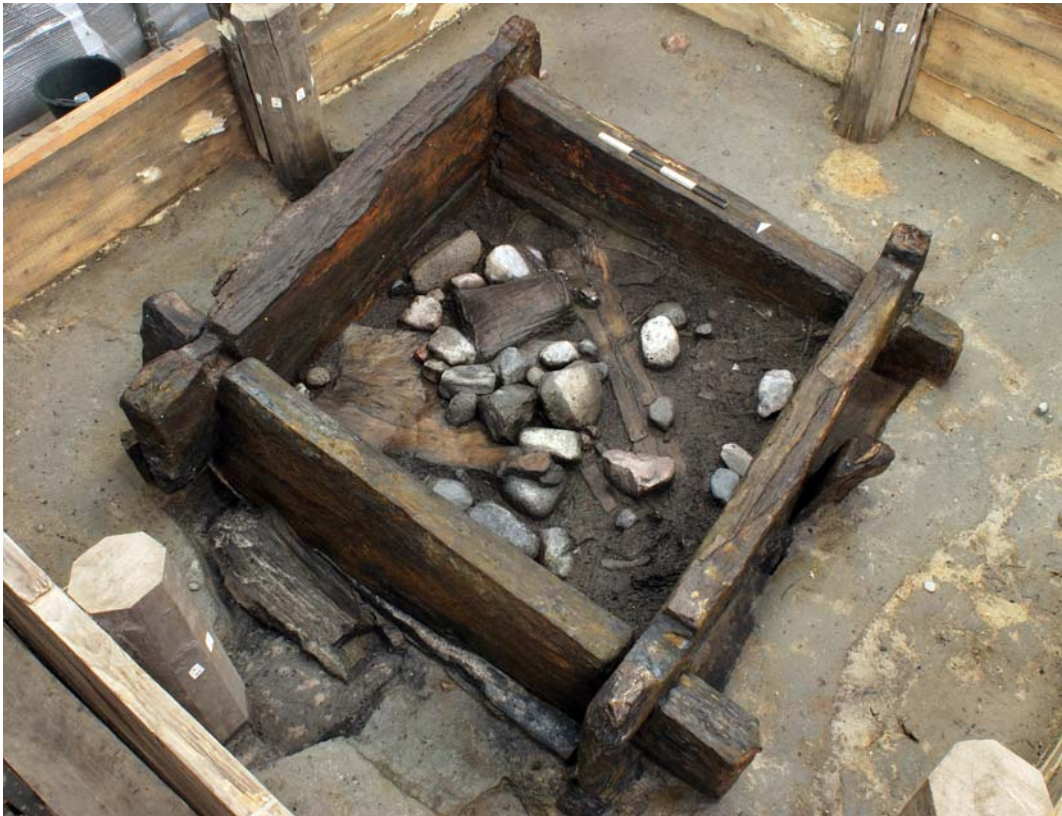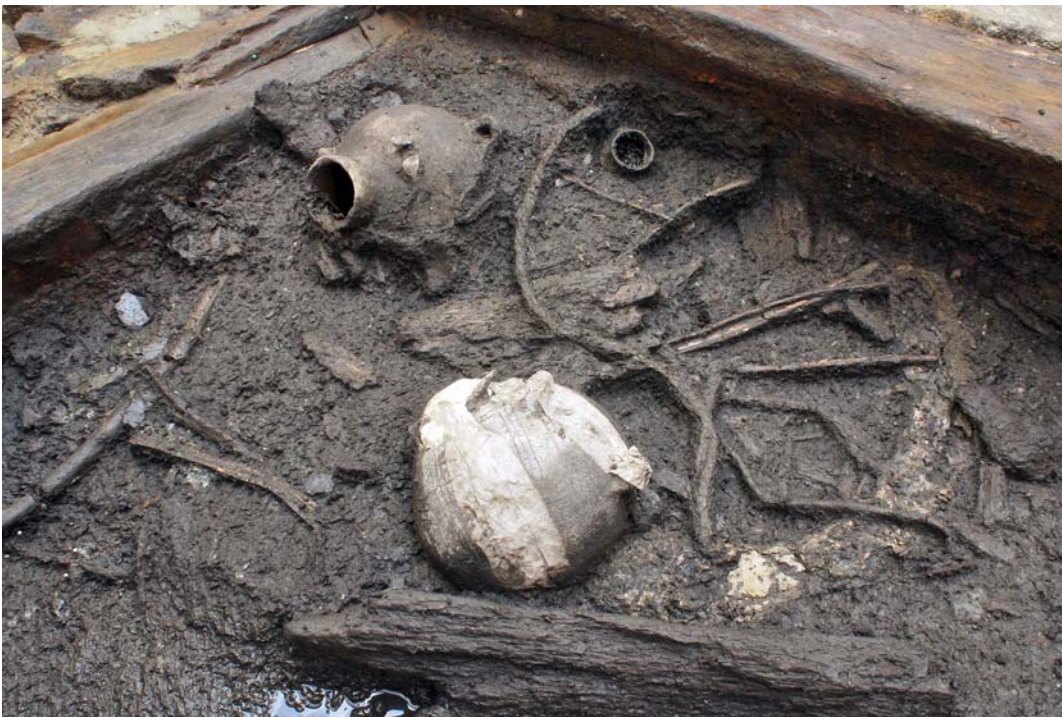

**Figure S3.** Indoor excavation of the Altscherbitz well.
