# Supplementary material for: Early Neolithic Water Wells Reveal the World's Oldest Wood Architecture
Source: PLOS journal article supplement (doi:10.1371/journal.pone.0051374), 2012-12-19
Supplement: S6 (10.1371/journal.pone.0051374.s006) [file journal.pone.0051374.s006]

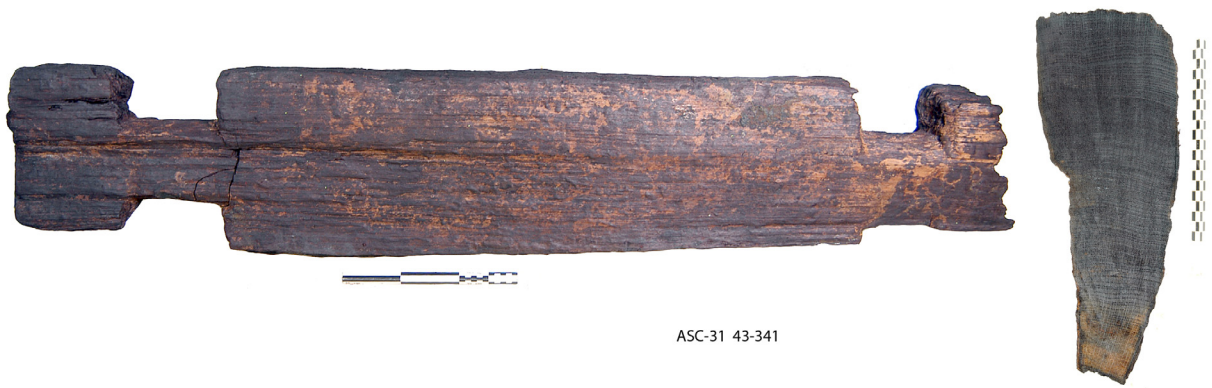

ASC-31 43-341

**Figure S5.** Timber from the Altscherbitz well lining and sawn cross section sample.
