# Supplementary material for: Early Neolithic Water Wells Reveal the World's Oldest Wood Architecture
Source: PLOS journal article supplement (doi:10.1371/journal.pone.0051374), 2012-12-19
Supplement: S7 (10.1371/journal.pone.0051374.s007) [file journal.pone.0051374.s007]

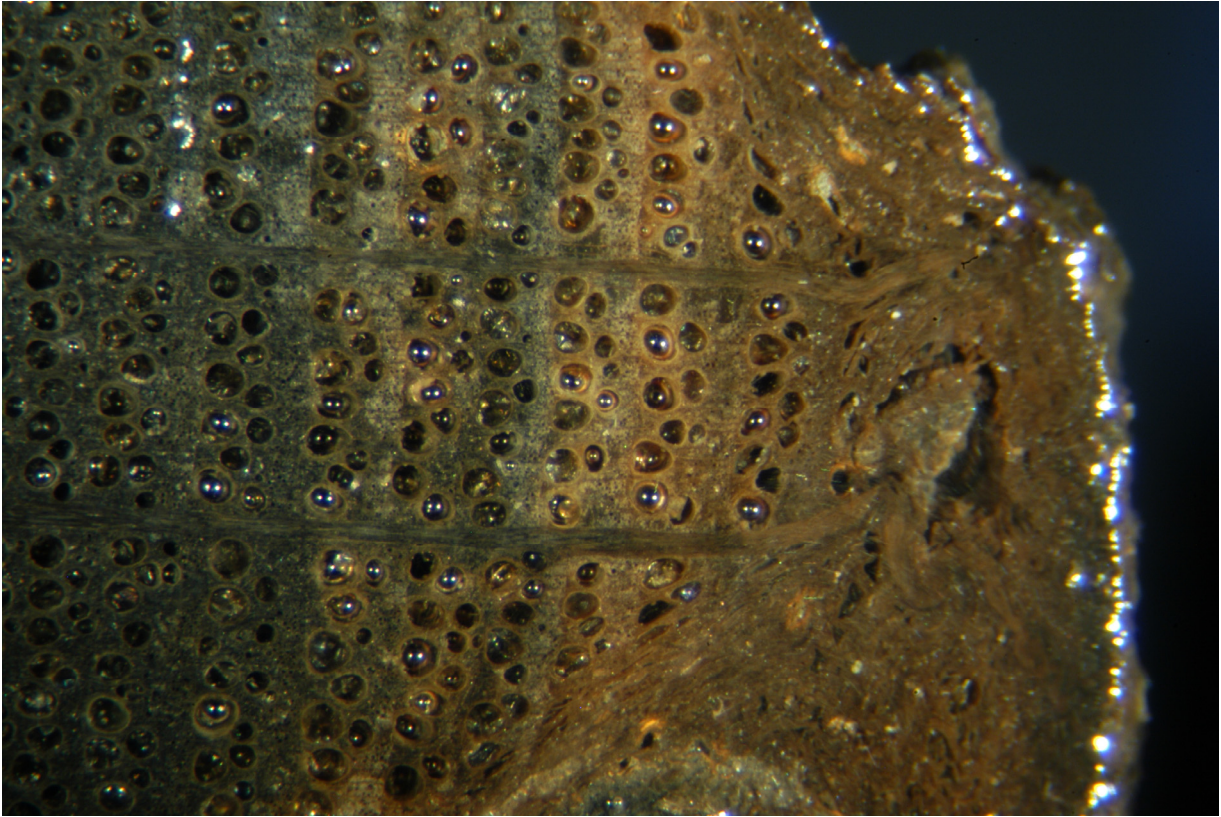

**Figure S6.** Close-up view of a cross section (at 16x magnification, Altscherbitz timber 31-155). The last two or three heartwood rings are discolored.
