# Supplementary material for: Early Neolithic Water Wells Reveal the World's Oldest Wood Architecture
Source: PLOS journal article supplement (doi:10.1371/journal.pone.0051374), 2012-12-19
Supplement: S12 (10.1371/journal.pone.0051374.s012) [file journal.pone.0051374.s012]

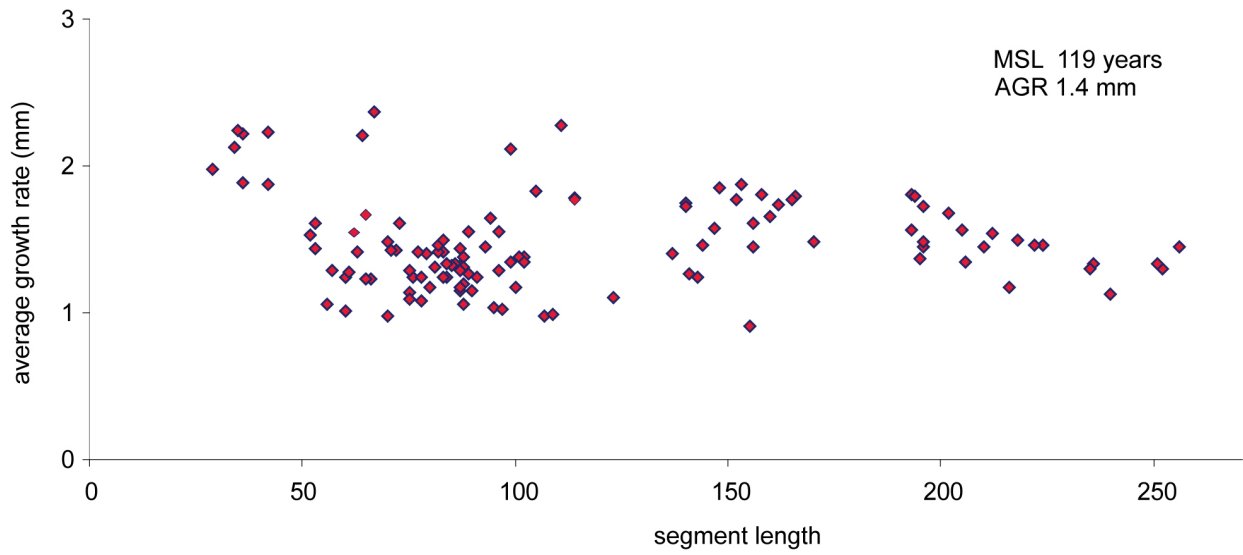

**Figure S11.** Relationship between average growth rate (AGR) and mean segment length (MSL) of the Altscherbitz dataset.
