# Supplementary material for: Early Neolithic Water Wells Reveal the World's Oldest Wood Architecture
Source: PLOS journal article supplement (doi:10.1371/journal.pone.0051374), 2012-12-19
Supplement: S13 (10.1371/journal.pone.0051374.s013) [file journal.pone.0051374.s013]

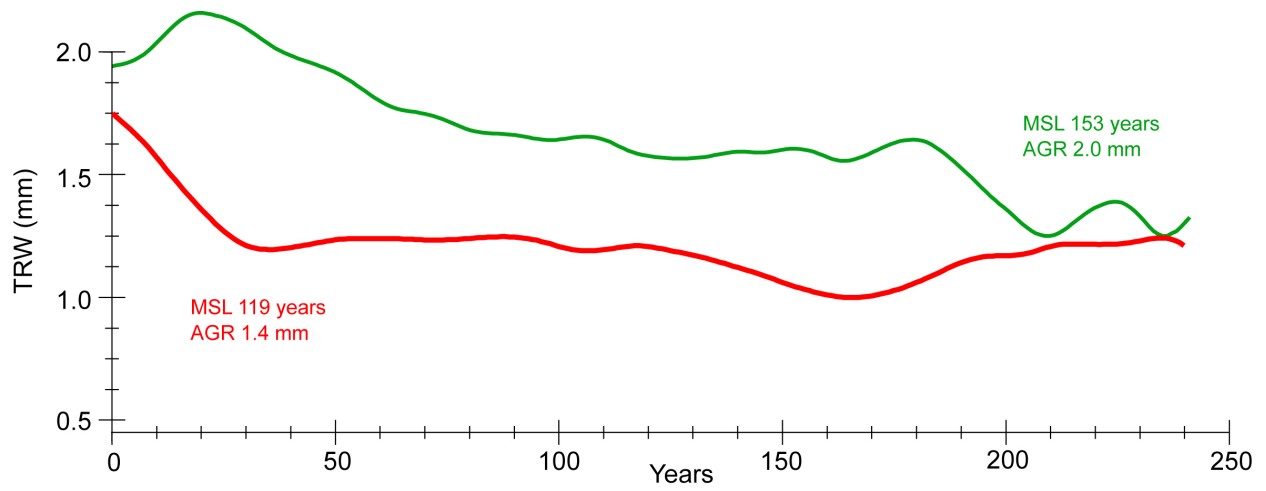

**Figure S12.** Smoothed regional curves representing the average age trend of recent oaks from Central Eastern Germany (green) and Early Neolithic oaks from the Altscherbitz well construction (red).
